# Supplementary material
Source: Research Square preprint supplement (doi:10.21203/rs.3.rs-9254666/v1)
Supplement: Supplementary file 1 [file 2cb9e72e87056cf039a50dc6.docx]

Genotypic variance component (²g) was calculates as;

Genotypic variance (²g) = (1)

Where MSg is genotypic mean square, MSe is error mean square and r is replication

Environmental variance component (²e) was calculated as;

Environmental variance (²e) = Mse (2)

Phenotypic variance component (²p)

²p = ²g +²e (3)

Genotypic and phenotypic coefficients of variation were calculated according to the method suggested by Burton and DeVane22as;

Genotypic coefficients of variation (GCV)

GCV = ×100% (4)

Phenotypic coefficients of variation (PCV)

PCV = ×100% (5)

Where X῀ is the grand mean value of the trait

Broad sense heritability (H2) in percent was estimated for each character using variance components as described by Allard30**.**

H² = (6)

The expected gain or genetic advance with one cycle of selection, assuming the selection intensity of 5%, was predicted as suggested by Johnson *et al*.18.

GA = K (²p) (H²) (7)

Where K is selection intensity of 5% = 2.06

Genetic advance in percent of the mean (GAM) was calculated to compare the extent of predicted genetic advance of different traits under selection, using the following formula:

GAM = (8)

Covariance analysis was carried out in the same way in that of analysis of variance, and the mean cross produce was equated with the expected mean square product. Covariance components were used to compute genotypic and phenotypic correlation coefficients31.

Genotypic covariance (Covgxy) of trait (x) and trait (y) were determined using the following formulas;

Covg xy = (9)

Where, MSCPgxy is genotypic mean cross product of traits x and y. *MSCP*gxy, is error mean cross product of traits x and y.

Phenotypic covariance (Cov pxy);

Covpxy = Covgxy + (10)

Genotypic and phenotypic correlation coefficients for all traits were estimated by calculating the variance and covariance at phenotypic and genotypic level by using the formula suggested by Singh31 and phenotypic and genotypic correlation between two variables, which includes both genotype and environmental components, were estimated using the formula suggested by Singh31.

rpxy = (11)

Genotypic correlation between traits (x) and (y) were computed as follow

rgxy= (12)

Where ²gx and ²gy are genotypic variance components of trait x and y.

The coefficient correlation at phenotypic level was tested for their significance using the t-test as formula suggested by Robertson32.

t= (13)

The calculated’ value was compared with tabulated’ at g-2 degree of freedom, where g is the number of farmers’ varieties. The correlation coefficient at genotypic level was also tested with the following formula.

t = (14)

Where, rgxy is the genotypic correlation coefficient, SErgxy is the standard error of genotypic correlation coefficient was estimated as follows

SErgxy= (15)
